# Supplementary material for: CoX2Y4: a family of two-dimensional magnets with versatile magnetic order
Source: Royal Society of Chemistry journal article supplement (doi:10.1039/d4nh00103f), 2024-01-01
Supplement: d4nh00103f1.pdf [file d4nh00103f1.pdf]

## Supplementary Information

# CoX<sub>2</sub>Y<sub>4</sub>: A Family of Two-Dimensional Magnets with Versatile Magnetic Order

Ziyuan Zhao<sup>\*ab</sup>, Zhao Liu<sup>ab</sup>, Mark T. Edmonds<sup>bc</sup> and Nikhil V. Medhekar<sup>\*ab</sup>

<sup>a</sup> *Department of Materials Science and Engineering, Monash University, Clayton, Victoria 3800, Australia. E-mail: [ziyuan.zhao@monash.edu](mailto:ziyuan.zhao@monash.edu); [nikhil.medhekar@monash.edu](mailto:nikhil.medhekar@monash.edu)*

<sup>b</sup> *ARC Centre of Excellence in Future Low-Energy Electronics Technologies FLEET, Monash University, Clayton, Victoria 3800, Australia.*

<sup>c</sup> *School of Physics and Astronomy, Monash University, Clayton, Victoria 3800, Australia.*

## Table of Contents

|                               |    |
|-------------------------------|----|
| 1. Computational Details..... | 2  |
| 2. Supporting Figures .....   | 7  |
| 3. Supporting Tables .....    | 14 |
| 4. References .....           | 17 |

## 1. Computational Details

We performed structural optimization, magnetic properties and thermal stabilities calculations for  $\text{CoX}_2\text{Y}_4$  SLs by using density functional theory (DFT) <sup>1</sup> within the generalized gradient approximation (GGA) <sup>2</sup> as implemented in the VASP code <sup>3,4</sup>. A vacuum of  $\sim 15$  Å was used to avoid interaction between adjacent layers. The cut-off energy for the expansion of wavefunctions into plane waves was set to 500 eV in all calculations. The Monkhorst-Pack  $k$  mesh of  $12 \times 12 \times 1$  was used to yield a good convergence. All structural optimizations were performed using a conjugate-gradient algorithm and a force tolerance criterion for convergence of 0.01 eV/Å. The energy convergence criterion was set to  $10^{-6}$  eV providing well-converged total energies of different magnetic configuration. Spin-orbit coupling was considered for calculating magneto-crystalline anisotropy energies (MAE) and confirming the easy axis <sup>5</sup>. Phonon dispersions were calculated in the Phonopy code, where the force constants were obtained from DFT calculations based on the supercell approach <sup>6</sup>.

The Hubbard  $U$  parameter plays a crucial role in adjusting the effective on-site electron-electron interaction within Co 3d-states<sup>7,8</sup>, thus impacting the ground magnetic state. To evaluate the robustness of the ground magnetic states of  $\text{CoX}_2\text{Y}_4$  SLs, we extensively tested different effective  $U$  values in the Dudarev's scheme and different  $J$  values (0 – 1 eV) with  $U = 4$  eV in Liechtenstein's scheme. The energy differences between collinear antiferromagnetic (*c*AFM), non-collinear antiferromagnetic (*nc*lAFM) and non-coplanar antiferromagnetic states (*ncp*AFM) relative to the ferromagnetic (FM) state of  $\text{CoX}_2\text{Y}_4$  SLs at different  $U$  and  $J$  values are depicted in Fig. SI and SII. Across a wide range of  $U$  and  $J$  values,  $\text{CoBi}_2\text{Te}_4$  remains *nc*lAFM as the ground magnetic state, and *c*AFM is the ground state for  $\text{CoBi}_2\text{Se}_2\text{Te}_2$ ,  $\text{CoBi}_2\text{Se}_4$  and  $\text{CoSb}_2\text{Te}_4$ . Our rigorous testing of  $U$  confirms the robustness of the ground magnetic states of  $\text{CoX}_2\text{Y}_4$ . Given that a  $U$  value of 4 eV was employed to analyze the magnetic and electronic properties of  $\text{MnBi}_2\text{Te}_4$  and  $\text{NiBi}_2\text{Te}_4$ <sup>9</sup>, and considering  $\text{CoX}_2\text{Y}_4$  shares isostructural similarity with  $\text{MnBi}_2\text{Te}_4$ -family materials, as well as the fact that Co, Mn and Ni belong to the same transition metal group in the periodic table, we opted for an effective  $U$  of 4 eV in Dudarev's scheme for  $\text{CoX}_2\text{Y}_4$ . As our comprehensive testing shows, this choice is dependable and highlights the importance of our findings regarding  $\text{CoX}_2\text{Y}_4$  SLs compared to other materials within the  $\text{MnBi}_2\text{Te}_4$  family.

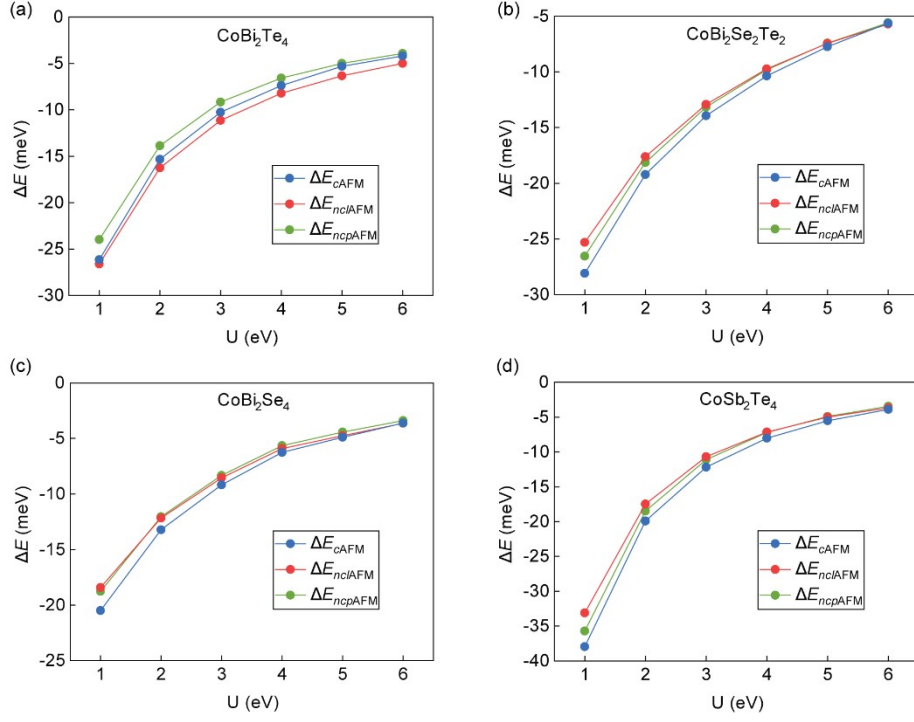

**Fig. SI** Energy difference per formula unit between different magnetic states for Co $X_2Y_4$  SLs as a function of different  $U_{eff}$  values in Dudarev's scheme.

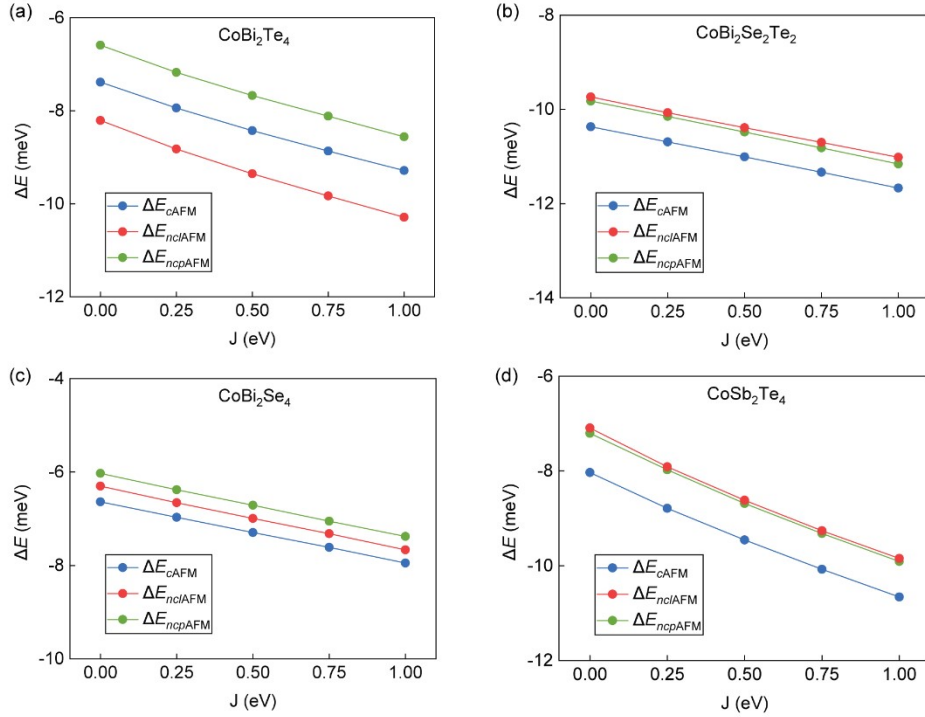

**Fig. SII** Energy difference per formula unit between different magnetic states for Co $X_2Y_4$  SLs as a function of different  $J$  values with  $U = 4$  eV in Liechtenstein's scheme.

The cohesive energies  $E^c$  of the  $\text{CoX}_2\text{Y}_4$  SLs were calculated by using the following formula,

$$E^c = (E_{\text{Co}} + 2E_{\text{X}} + 4E_{\text{Y}} - E_{\text{CoX}_2\text{Y}_4})/7$$

where  $E_{\text{Co}}$ ,  $E_{\text{X}}$ ,  $E_{\text{Y}}$ , and  $E_{\text{CoX}_2\text{Y}_4}$  are the total energies of one Co atom, one Bi or Sb atom, one Te or Se atom, and one unit cell of the  $\text{CoBi}_2\text{Te}_4$  SL.

To search the magnetic ground state, we built a *c*AFM configuration of  $2 \times 2$  in-plane supercells containing four Co atoms per SL, a triangular *ncl*AFM configuration of  $\sqrt{3} \times \sqrt{3}R30^\circ$  in-plane supercells containing three Co atoms per SL, and a non-coplanar antiferromagnetism (*n**cp*AFM) configuration of  $2 \times 2$  in-plane supercells containing four Co atoms per SL. The Monkhorst–Pack *k*-mesh of  $7 \times 7 \times 1$  and  $6 \times 6 \times 1$  were selected for the calculations of  $\sqrt{3} \times \sqrt{3}R30^\circ$  and  $2 \times 2$  supercells, respectively. And magnetic anisotropy energies were calculated by using dense *k*-point meshes of  $18 \times 18 \times 1$ .

To estimate exchange coupling parameters based on 2D Heisenberg model, we define a spin Hamiltonian as,

$$\hat{H} = E_0 - \sum_{\langle ij \rangle}^N J_1 \vec{S}_i \cdot \vec{S}_j - \sum_{\langle\langle ij \rangle\rangle}^N J_2 \vec{S}_i \cdot \vec{S}_j$$

where  $J_1$  and  $J_2$  are the exchange coupling parameters between nearest and next-nearest neighbour Co atoms,  $E_0$  is the reference energy, the summation  $\langle ij \rangle$  runs over all nearest neighbour Co sites, and the summation  $\langle\langle ij \rangle\rangle$  runs over all next-nearest neighbour Co sites. Since the *d*-electrons of Co of  $\text{CoX}_2\text{Y}_4$

form a high spin state, we used  $S = \frac{3}{2}$  for Co. The exchange parameters  $J_1$  and  $J_2$  can be derived from the mapping analysis of different spin configurations. We built three different spin configurations, i.e., FM, *c*AFM and *ncl*AFM, within six-fold unit cells, as shown in Fig. SIII.

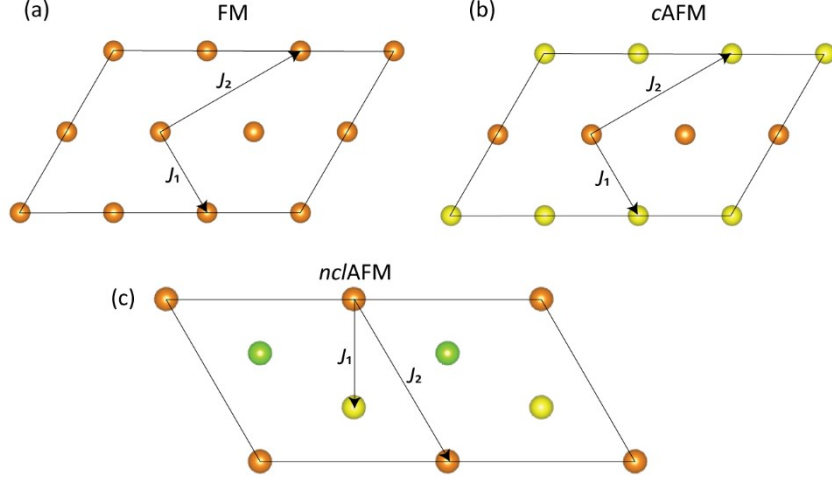

**Fig. SIII** The top view of Co atoms in FM (a), *c*AFM (b) and *ncl*AFM (c) configurations within six-fold unit cells. The different colours of Co atoms represent different spin orientations.

By counting the nearest and next-nearest neighbour Co atom pairs, we know that there are 18 nearest neighbour pairs and 18 next-nearest neighbour pairs. For the FM configuration,  $S_i$  and  $S_j$  are same, the spin Hamiltonian can be written as

$$E_{\text{FM}} = E_0 - 18J_1S^2 - 18J_2S^2 \quad (1)$$

In the *c*AFM configuration, 6 spin pairs of 18 pairs have the same sign, and the other 12 pairs have different signs for both nearest and next-nearest neighbour Co atoms. The total energy of *c*AFM is

$$E_{\text{cAFM}} = E_0 + 6J_1S^2 + 6J_2S^2 \quad (2)$$

For the *ncl*AFM configuration, there are three kinds of Co atoms with different in-plane spin orientations, and the spin orientations are not collinear. We can label them as  $S_1$ ,  $S_2$  and  $S_3$  and define the spin orientation by describing components on the  $x$  and  $y$  axis, as:

$$S_{1x} = -S\cos 30^\circ, S_{1y} = S\sin 30^\circ, S_{2x} = S\cos 30^\circ, S_{2y} = S\sin 30^\circ, S_{3x} = S\cos 90^\circ, \text{ and } S_{3y} = -S\sin 90^\circ$$

The spin Hamiltonian of *ncl*AFM configuration is thus,

$$\begin{aligned} E_{\text{nclAFM}} = E_0 - 6J_1[(S_{1x}S_{2x} + S_{1x}S_{3x} + S_{2x}S_{3x}) + (S_{1y}S_{2y} + S_{1y}S_{3y} + S_{2y}S_{3y})] - 6J_2[(S_{1x}S_{1x} + S_{2x}S_{2x} + S_{3x}S_{3x}) + \\ (S_{1y}S_{1y} + S_{2y}S_{2y} + S_{3y}S_{3y})] \\ E_{\text{nclAFM}} = E_0 + 9J_1S^2 - 18J_2S^2 \end{aligned} \quad (3)$$

From equations (1), (2) and (3), we obtain  $J_1$  and  $J_2$  for all  $\text{CoX}_2\text{Y}_4$  SLs.

Monte Carlo simulations were performed using a  $32 \times 32$  supercell containing 1024 spin sites. During the simulations, each spin rotates randomly in all directions. The critical temperature was finally obtained from the peak in the magnetic heat capacity.

We include the dipole-dipole interaction energies on both in-plane and out-of-plane magnetization directions to obtain the MAE with the dipole-dipole corrections for  $\text{CoX}_2\text{Y}_4$  SLs. The dipole-dipole interaction energy can be expressed as:

$$E_{\text{dd}} = \frac{1}{N} \frac{\mu_0}{4\pi} \sum_{i \neq j}^N \left[ \frac{\vec{M}_i \cdot \vec{M}_j}{r_{ij}^3} - \frac{3(\vec{M}_i \cdot \vec{r}_{ij})(\vec{M}_j \cdot \vec{r}_{ij})}{r_{ij}^5} \right]$$

## 2. Supporting Figures

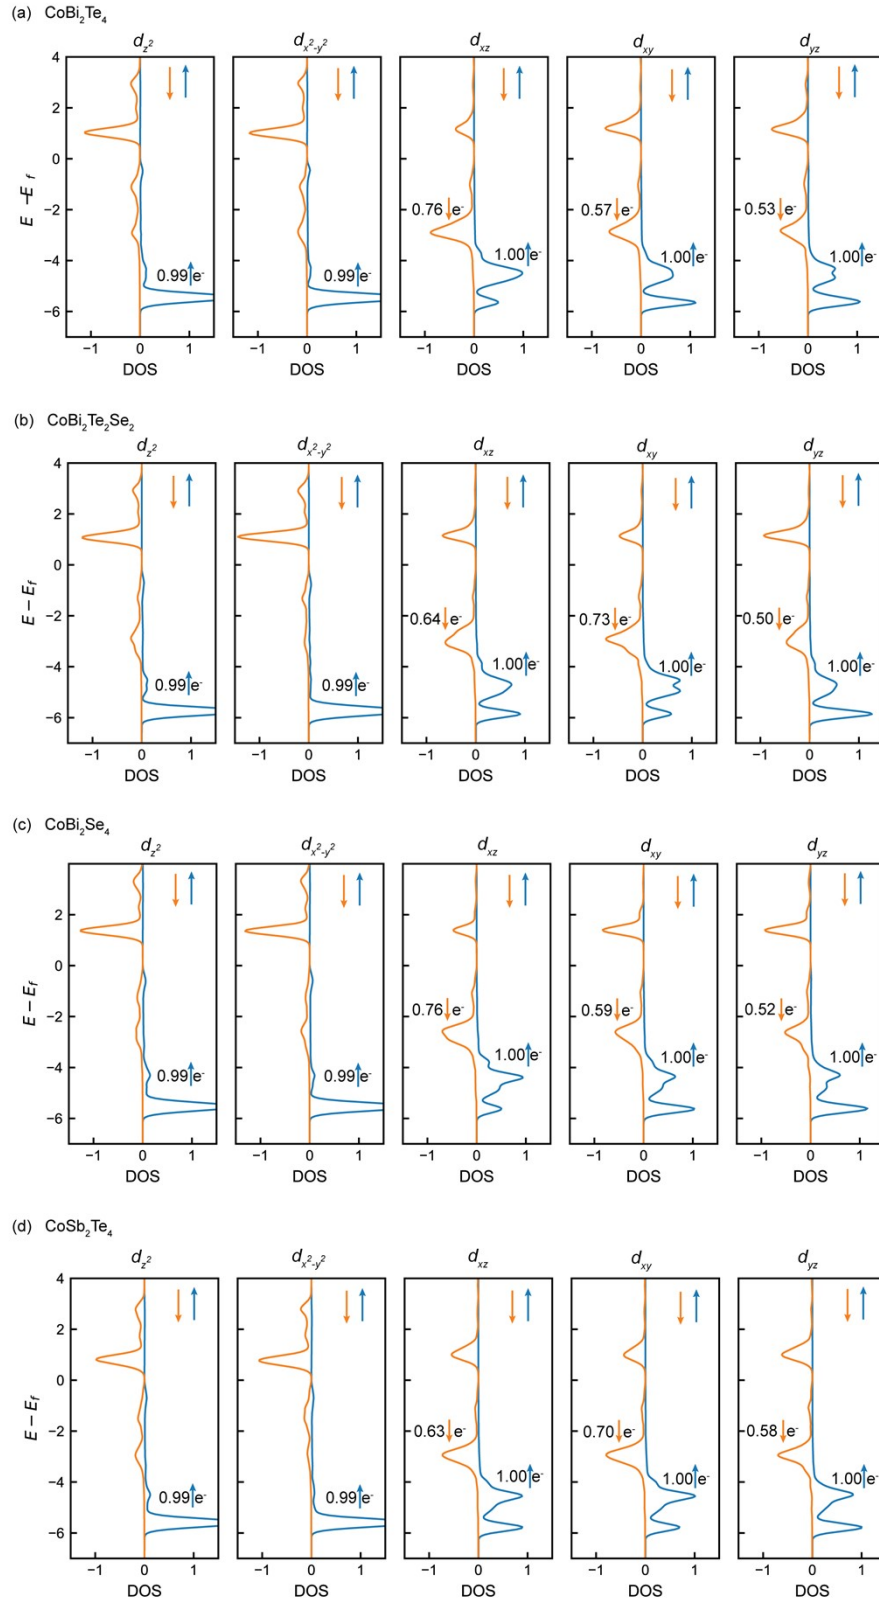

**Fig. S1** The projected density of states (PDOS) for the  $d$ -orbitals of Co atom in  $\text{CoX}_2\text{Y}_4$  SLs. The integrated PDOS of spin-up state on each  $d$ -orbital is  $\sim 1$  eV, indicating each  $d$ -orbital is occupied by one spin-up electron. Another two electrons fractionally occupy the three degenerate  $t_{2g}$  orbitals with lower energy.

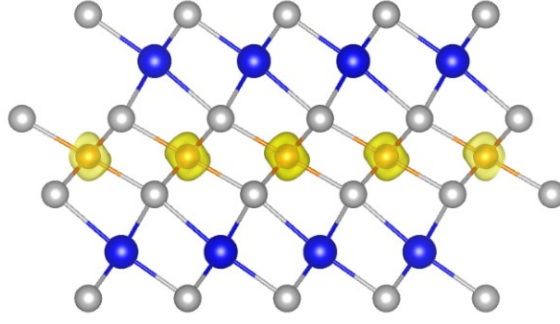

**Fig. S2** Spin density distribution of  $\text{CoBi}_2\text{Te}_4$  with an isosurface value of 0.03 au. The spin density is concentrated around the Co atoms, indicating that Co provides the magnetism.

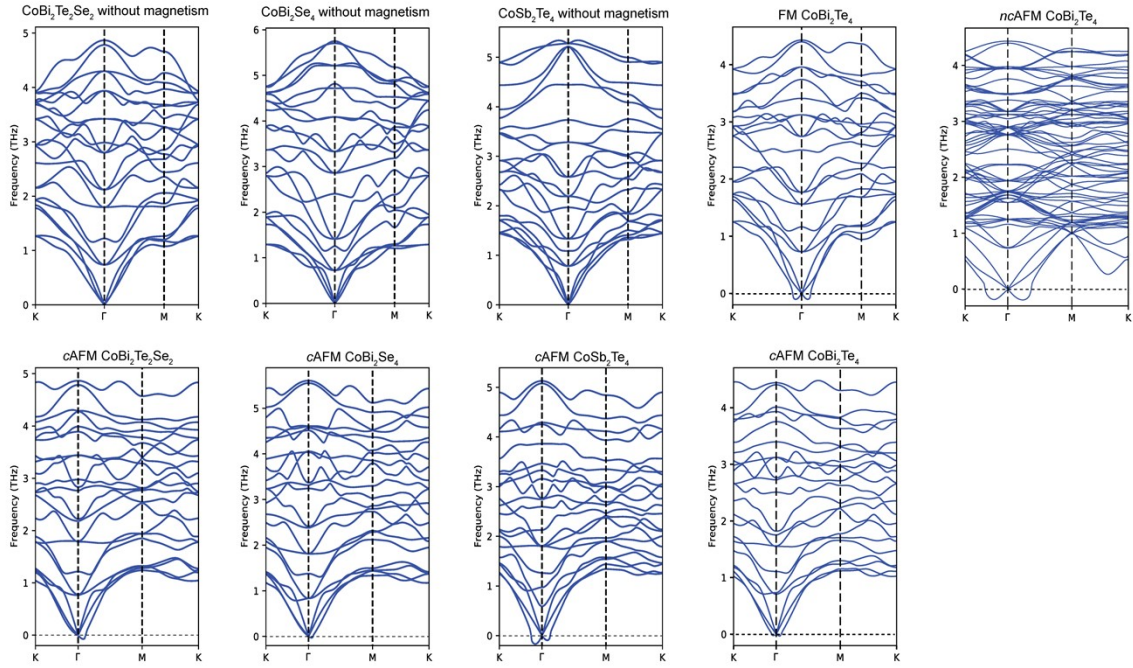

**Fig. S3** The phonon spectra of  $\text{CoBi}_2\text{Te}_2\text{Se}_2$ ,  $\text{CoBi}_2\text{Se}_4$ ,  $\text{CoSb}_2\text{Te}_4$ , and  $\text{CoBi}_2\text{Te}_4$  SLs. The small negative phonon frequencies observed in the acoustic branches near the  $\Gamma$  point stem from minor numerical inaccuracies, which slightly break the continuous translational invariance of a solid.

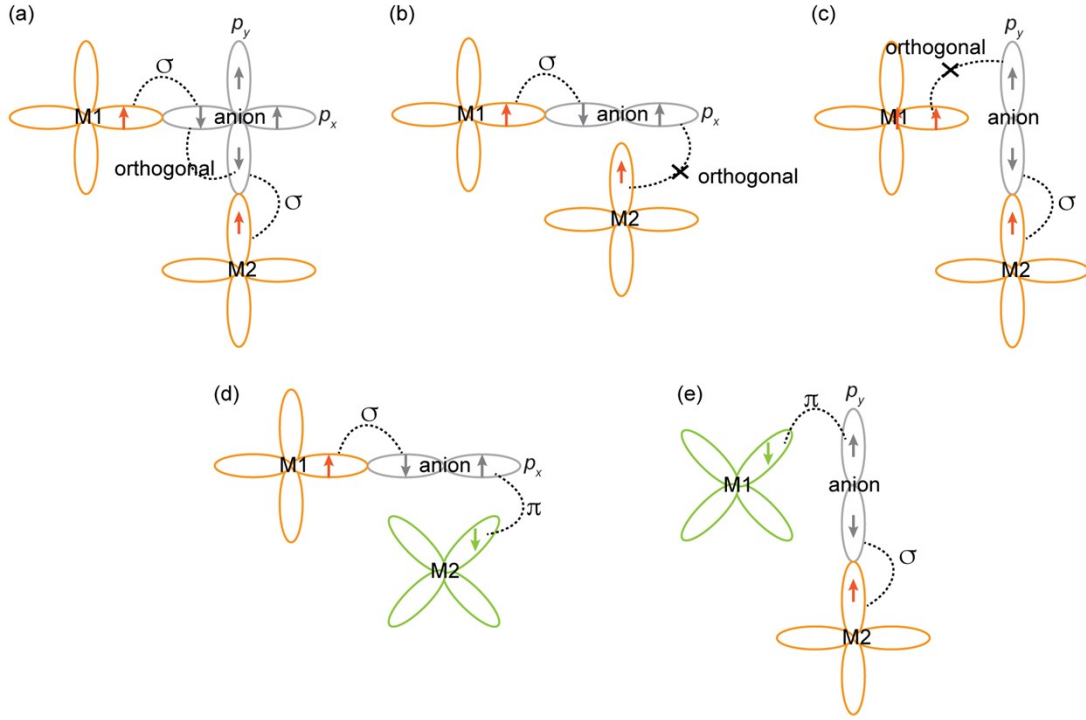

**Fig. S4** (a-c) The 90° ferromagnetic superexchange interaction explained by Goodenough-Kanamori-Anderson rules. (d, f) The 90° antiferromagnetic superexchange channels consisting of  $\sigma$  and  $\pi$ -bond orbital overlap.

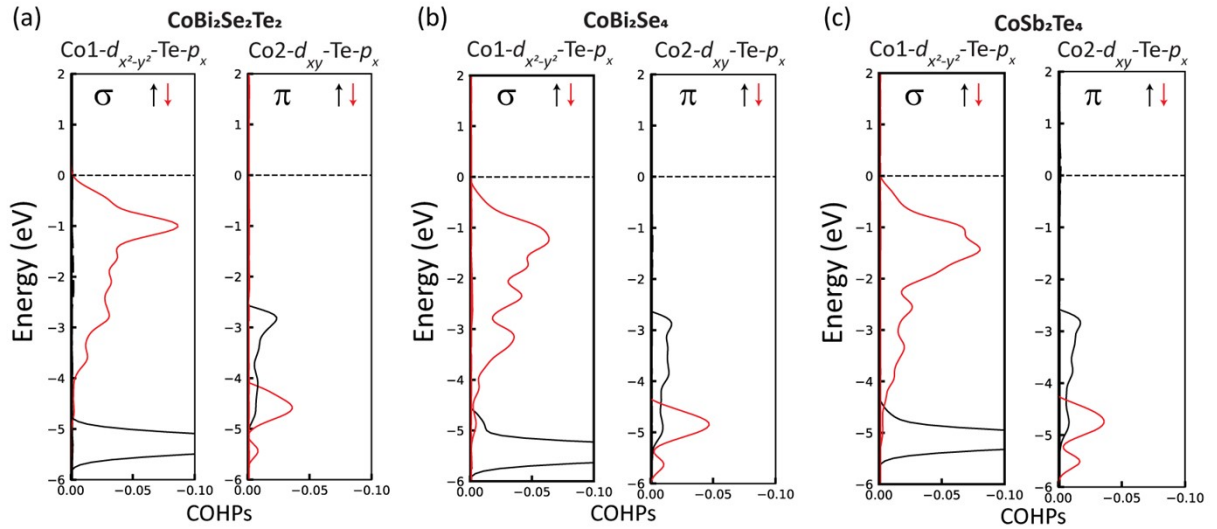

**Fig. S5** COHPs of overlap between (a)  $\text{Co1-}d_{x^2-y^2}-\text{Se-}p_x$  orbitals and  $\text{Co2-}d_{xz}-\text{Se-}p_x$  orbitals in  $\text{CoBi}_2\text{Se}_2\text{Te}_2$  SL, (b)  $\text{Co1-}d_{x^2-y^2}-\text{Se-}p_x$  orbitals and  $\text{Co2-}d_{xz}-\text{Se-}p_x$  orbitals in  $\text{CoBi}_2\text{Se}_4$  SL, and (c)  $\text{Co1-}d_{x^2-y^2}-\text{Te-}p_x$  orbitals and  $\text{Co2-}d_{xz}-\text{Te-}p_x$  orbitals in  $\text{CoSb}_2\text{Te}_4$  SL. The strength of the  $\sigma$  and  $\pi$  bond in all cases is comparable to that of  $\text{CoBi}_2\text{Te}_4$ , leading to the antiferromagnetic coupling.

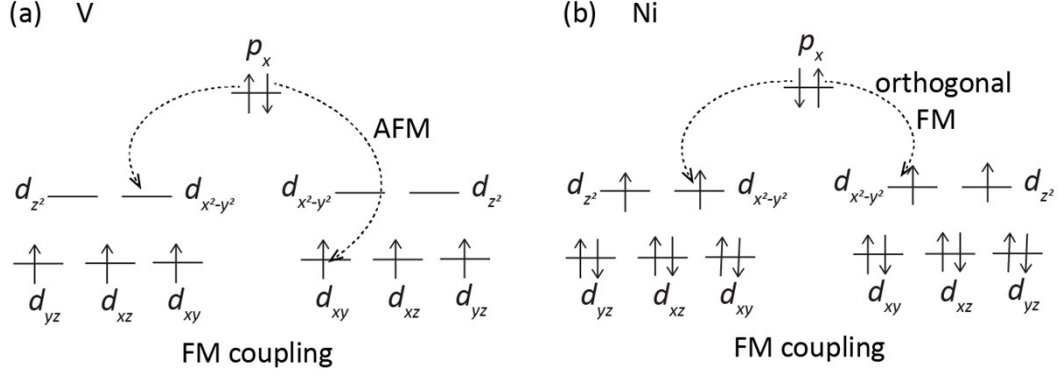

**Fig. S6** (a) Schematics of ferromagnetic superexchange interaction between V1- $d_{x^2-y^2}$ -Te- $p_x$  and V2- $d_{xy}$ -Te- $p_x$  in the VBi<sub>2</sub>Te<sub>4</sub> septuple layer. The  $d_{x^2-y^2}$ -orbital of V is empty, which allows the hopping of spin-up electrons of Te- $p_x$  orbital. And the remaining spin-down electron will not shift the spin-up electron of the  $d_{xy}$  orbital of the other V. Thus, it forms a ferromagnetic coupling. (b) Schematic of ferromagnetic superexchange interaction between Ni1- $d_{x^2-y^2}$ -Te- $p_x$  and Ni2- $d_{xy}$ -Te- $p_x$  in the NiBi<sub>2</sub>Te<sub>4</sub> septuple layer. The  $d_{xy}$  orbital in Ni is fully occupied, which cannot accommodate extra electrons; and the Te- $p_x$  is orthogonal to the  $d_{x^2-y^2}$ -orbital of the other Ni, leading to a ferromagnetic coupling.

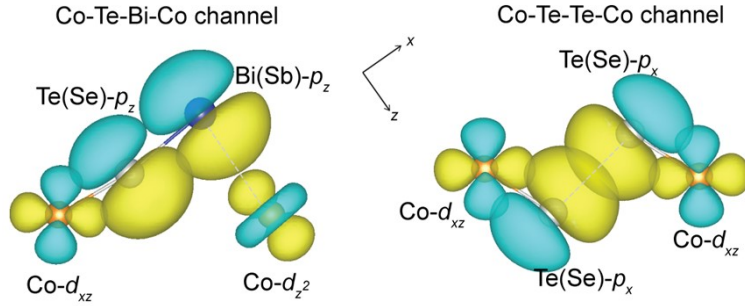

**Fig. S7** The Co- $d_{xz}$ -Te(Se)- $p_z$ -Bi(Sb)- $p_z$ -Co- $d_{z^2}$  and Co- $d_{xz}$ -Te(Se)- $p_x$ -Te(Se)- $p_x$ -Co- $d_{xz}$  super-superexchange channels with orbital shapes. The orbitals are rotated according to local chemical bonds, which are linear arranged along the x and z axis.

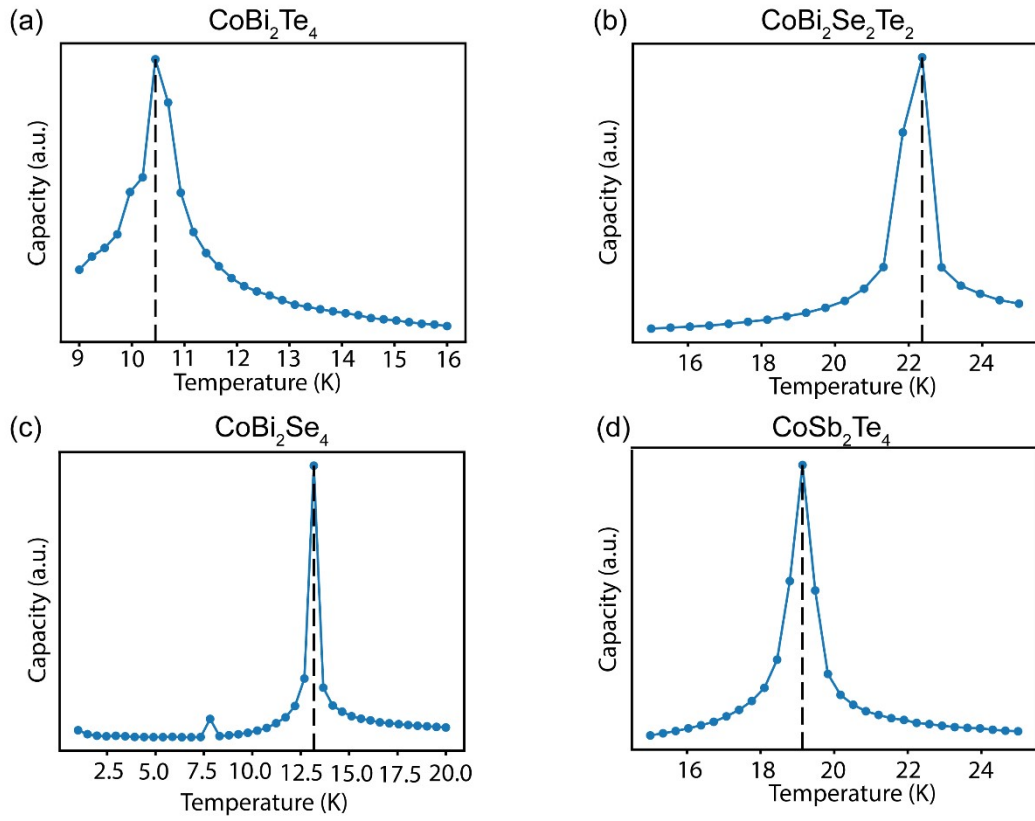

**Fig. S8** Magnetic capacities of  $\text{CoBi}_2\text{Te}_4$  (a),  $\text{CoBi}_2\text{Se}_2\text{Te}_2$  (b),  $\text{CoBi}_2\text{Se}_4$  (c), and  $\text{CoSb}_2\text{Te}_4$  (d) SLs from Monte Carlo simulation. The dashed line represents the  $N^{\text{el}}$  temperature.

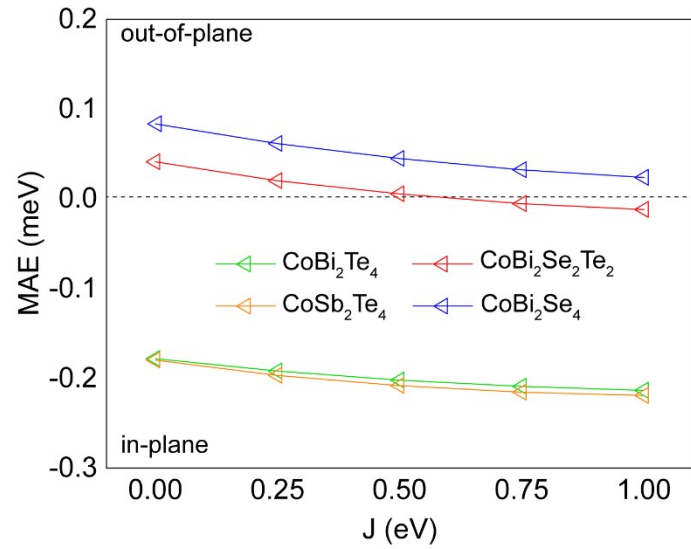

**Fig. S9** The MAE for  $\text{CoX}_2\text{Y}_4$  SLs as a function of different  $J$  values with  $U = 4$  eV in Liechtenstein's scheme. ( $\text{MAE} = E_{\text{in-plane}} - E_{\text{out-of-plane}}$ )

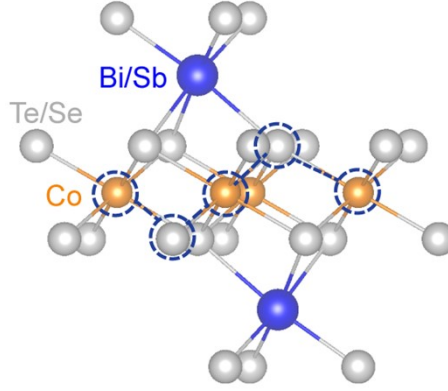

**Fig. S10** The FM super-superechange coupling via Co-Te(Se)-Co-Te(Se)-Co channel.

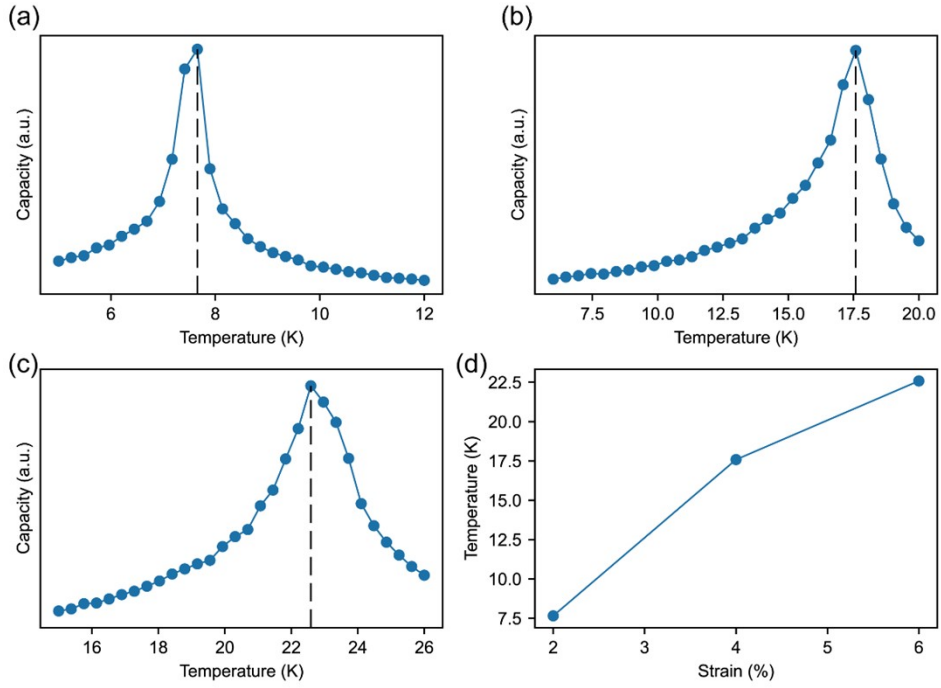

**Fig. S11** Magnetic capacities of the *ncI*AFM state of  $\text{CoSb}_2\text{Te}_4$  SL under the biaxial strains of 2% (a), 4% (b) and 6% (c). (d) The change of  $T_{\text{Neel}}$  temperatures as a function of biaxial strain.

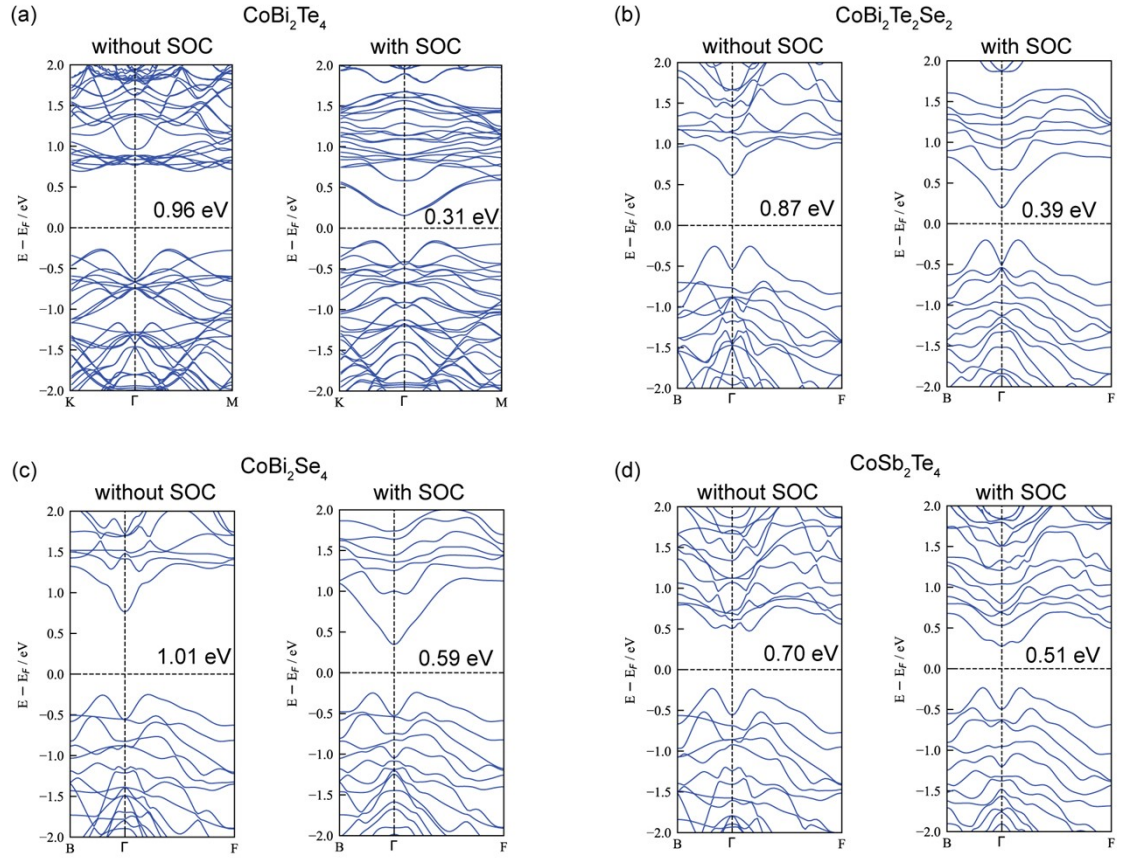

**Fig. S12** The band structures of *nc*/AFM  $\text{CoBi}_2\text{Te}_4$  (a), *c*AFM  $\text{CoBi}_2\text{Te}_2\text{Se}_2$  (b), *c*AFM  $\text{CoBi}_2\text{Se}_4$  (c), and *c*AFM  $\text{CoSb}_2\text{Te}_4$  (d) SLs without and with spin-orbital coupling, respectively.

### 3. Supporting Tables

**Table S1.** Structural information for  $\text{CoX}_2\text{Y}_4$  SLs.

|                                          | Lattice Parameter<br>$a = b$ (Å) | Thickness<br>(Å) | Angle Co/Mn-<br>Te/Se-Co/Mn (°) | Cohesive Energy<br>(eV/atom) |
|------------------------------------------|----------------------------------|------------------|---------------------------------|------------------------------|
| $\text{CoBi}_2\text{Te}_4$ SL            | 4.33                             | 10.70            | 97.54                           | 3.10                         |
| $\text{CoBi}_2\text{Se}_2\text{Te}_2$ SL | 4.18                             | 10.22            | 99.62                           | 3.26                         |
| $\text{CoBi}_2\text{Se}_4$ SL            | 4.07                             | 9.95             | 98.08                           | 3.43                         |
| $\text{CoSb}_2\text{Te}_4$ SL            | 4.26                             | 10.44            | 96.66                           | 3.07                         |
| $\text{MnBi}_2\text{Te}_4$ SL            | 4.38                             | 10.93            | 94.18                           | 2.77                         |

**Table S2.** Bond lengths in  $\text{CoX}_2\text{Y}_4$  SLs.

|                                       | Co-Te(Se)<br>(Å) | Te(Se)-Te(Se)<br>(Å) | Te(Se)-Bi(Sb)<br>(Å) | Bi(Sb)-Co<br>(Å) |
|---------------------------------------|------------------|----------------------|----------------------|------------------|
| $\text{CoBi}_2\text{Te}_4$            | 2.88             | 3.79                 | 3.31                 | 4.38             |
| $\text{CoBi}_2\text{Se}_2\text{Te}_2$ | 2.74             | 3.53                 | 3.13                 | 4.07             |
| $\text{CoBi}_2\text{Se}_4$            | 2.70             | 3.54                 | 3.12                 | 4.11             |
| $\text{CoSb}_2\text{Te}_4$            | 2.85             | 3.79                 | 3.22                 | 4.30             |

**Table S3.** The total energies of the high-spin ( $E_{S=3/2}$ ) and low-spin ( $E_{S=1/2}$ ) states of Co in  $\text{CoX}_2\text{Y}_4$  SLs.

|                                       | $E_{S=3/2}$ (eV/f.u.) | $E_{S=1/2}$ (eV/f.u.) |
|---------------------------------------|-----------------------|-----------------------|
| $\text{CoBi}_2\text{Te}_4$            | -25.77                | -25.31                |
| $\text{CoBi}_2\text{Se}_2\text{Te}_2$ | -27.17                | -26.48                |
| $\text{CoBi}_2\text{Se}_4$            | -28.55                | -27.82                |

|                                   |        |        |
|-----------------------------------|--------|--------|
| CoSb <sub>2</sub> Te <sub>4</sub> | -25.80 | -25.47 |
|-----------------------------------|--------|--------|

**Table S4.** The formation energies of CoX<sub>2</sub>Y<sub>4</sub> SLs relative to elemental solids. The formation energies  $E^f$  were calculated by using the formula,  $E^f = (E_{CoX_2Y_4} - E_{Co} + 2E_X + 4E_Y)/7$ , where  $E_{CoX_2Y_4}$  is the total energy of one unit cell of the CoBi<sub>2</sub>Te<sub>4</sub> SL.  $E_{Co}$ ,  $E_X$ , and  $E_Y$  are the energies per atom of  $Fm\bar{3}m$  Co,  $R\bar{3}m$  Bi,  $R\bar{3}m$  Sb,  $P3_121$  Te, and  $P3_121$  Se.

|                                                      | Formation energy<br>(eV/atom) |
|------------------------------------------------------|-------------------------------|
| CoBi <sub>2</sub> Te <sub>4</sub> SL                 | -0.21                         |
| CoBi <sub>2</sub> Se <sub>2</sub> Te <sub>2</sub> SL | -0.31                         |
| CoBi <sub>2</sub> Se <sub>4</sub> SL                 | -0.40                         |
| CoSb <sub>2</sub> Te <sub>4</sub> SL                 | -0.13                         |

**Table S5.** The energy difference between different magnetic configurations for CoX<sub>2</sub>Y<sub>4</sub> SLs, obtained by considering SOC ( $\Delta E_{cAFM} = E_{cAFM} - E_{FM}$ ;  $\Delta E_{nclAFM} = E_{nclAFM} - E_{FM}$ ;  $\Delta E_{ncpAFM} = E_{ncpAFM} - E_{FM}$ ), meV per unit cell.

|                                                   | $\Delta E_{cAFM}$ | $\Delta E_{nclAFM}$ | $\Delta E_{ncpAFM}$ |
|---------------------------------------------------|-------------------|---------------------|---------------------|
| CoBi <sub>2</sub> Te <sub>4</sub>                 | -6.87             | -7.61               | -5.56               |
| CoBi <sub>2</sub> Se <sub>2</sub> Te <sub>2</sub> | -10.27            | -9.88               | -9.89               |
| CoBi <sub>2</sub> Se <sub>4</sub>                 | -6.21             | -6.17               | -5.69               |
| CoSb <sub>2</sub> Te <sub>4</sub>                 | -7.37             | -6.44               | -5.97               |

**Table S6.** The hopping energies of the Co-Te(Se)-Bi(Sb)-Co and Co-Te(Se)-Te(Se)-Co super-superexchange couplings.  $\tau_{\text{Co-Te(Se)-Bi(Sb)-Co}} = \tau_{\text{Co-Te(Se)}}\tau_{\text{Te(Se)-Bi(Sb)}}\tau_{\text{Bi(Sb)-Co}}$ ;  $\tau_{\text{Co-Te(Se)-Te(Se)-Co}} = \tau_{\text{Co-Te(Se)}}\tau_{\text{Te(Se)-Te(Se)-Co}}$ ;  $\tau_{\text{eff}} = \tau_{\text{Co-Te(Se)-Bi(Sb)-Co}} + \tau_{\text{Co-Te(Se)-Te(Se)-Co}}$

|                                                   | $\tau_{\text{Co-Te(Se)}} \text{ (eV)}$ | $\tau_{\text{Te(Se)-Bi(Sb)}} \text{ (eV)}$ | $\tau_{\text{Te(Se)-Te(Se)}} \text{ (eV)}$ | $\tau_{\text{Bi(Sb)-Co}} \text{ (eV)}$ | $\tau_{\text{Co-Te(Se)-Bi(Sb)-Co}} \text{ (eV)}$ | $\tau_{\text{Co-Te(Se)-Te(Se)-Co}} \text{ (eV)}$ | $\tau_{\text{eff}} \text{ (eV)}$ |
|---------------------------------------------------|----------------------------------------|--------------------------------------------|--------------------------------------------|----------------------------------------|--------------------------------------------------|--------------------------------------------------|----------------------------------|
| CoBi <sub>2</sub> Te <sub>4</sub>                 | 0.23                                   | 0.29                                       | 1.07                                       | 0.04                                   | 0.0027                                           | 0.0566                                           | 0.0593                           |
| CoBi <sub>2</sub> Se <sub>2</sub> Te <sub>2</sub> | 0.25                                   | 0.32                                       | 0.95                                       | 0.12                                   | 0.0096                                           | 0.0594                                           | 0.0690                           |
| CoBi <sub>2</sub> Se <sub>4</sub>                 | 0.24                                   | 0.34                                       | 0.96                                       | 0.09                                   | 0.0073                                           | 0.0553                                           | 0.0626                           |
| CoSb <sub>2</sub> Te <sub>4</sub>                 | 0.25                                   | 0.30                                       | 1.09                                       | 0.04                                   | 0.0030                                           | 0.0681                                           | 0.0711                           |

**Table S7.** The magnetic anisotropy energy (MAE) per Co ( $\text{MAE} = E_{\text{in-plane}} - E_{\text{out-of-plane}}$ ).  $\text{MAE}_{\text{soc}}$  is the MAE with spin-orbital coupling,  $\text{MAE}_{\text{dd}}$  is the MAE with dipole-dipole corrections, and  $\text{MAE}_{\text{total}}$  contains the joint effects of SOC and dipole-dipole corrections.

|                                                      | $\text{MAE}_{\text{soc}} \text{ (meV)}$ | $\text{MAE}_{\text{dd}} \text{ (meV)}$ | $\text{MAE}_{\text{total}} \text{ (meV)}$ |
|------------------------------------------------------|-----------------------------------------|----------------------------------------|-------------------------------------------|
| CoBi <sub>2</sub> Te <sub>4</sub> SL                 | -0.177                                  | 0.006                                  | -0.171                                    |
| CoBi <sub>2</sub> Se <sub>2</sub> Te <sub>2</sub> SL | 0.041                                   | 0.007                                  | 0.048                                     |
| CoBi <sub>2</sub> Se <sub>4</sub> SL                 | 0.084                                   | 0.008                                  | 0.092                                     |
| CoSb <sub>2</sub> Te <sub>4</sub> SL                 | -0.180                                  | 0.007                                  | -0.173                                    |

#### 4. References

- 1 W. Kohn and L. J. Sham, *Phys. Rev.*, 1965, **140**, A1133–A1138.
- 2 J. P. Perdew, K. Burke and M. Ernzerhof, *Phys. Rev. Lett.*, 1996, **77**, 3865–3868.
- 3 G. Kresse and J. Furthmüller, *Phys. Rev. B*, 1996, **54**, 11169–11186.
- 4 G. Kresse and D. Joubert, *Phys. Rev. B*, 1999, **59**, 1758–1775.
- 5 D. D. Koelling and B. N. Harmon, *J. Phys. C: Solid State Phys.*, 1977, **10**, 3107.
- 6 A. Togo, F. Oba and I. Tanaka, *Phys. Rev. B*, 2008, **78**, 134106.
- 7 S. Grimme, J. Antony, S. Ehrlich and H. Krieg, *J. Chem. Phys.*, 2010, **132**, 154104.
- 8 S. Grimme, S. Ehrlich and L. Goerigk, *Journal of Computational Chemistry*, 2011, **32**, 1456–1465.
- 9 J. Li, Y. Li, S. Du, Z. Wang, B.-L. Gu, S.-C. Zhang, K. He, W. Duan and Y. Xu, *Science Advances*, 2019, **5**, eaaw5685.
